# Supplementary material for: Laboratory Measurements of Hydraulic Jacking Uplift Pressure at Offset Joints and Cracks
Source: Atypon-hosted journal article supplement (doi:10.1061/jhend8.hyeng-13871), 2024-04-10
Supplement: supplemental materials_jhend8.hyeng-13871_wahl.pdf [file supplemental%20materials_jhend8.hyeng-13871_wahl.pdf]

## SUPPLEMENTAL MATERIALS

*ASCE Journal of Hydraulic Engineering*

# Laboratory Measurements of Hydraulic Jacking Uplift Pressure at Offset Joints and Cracks

Tony L. Wahl and Bryan J. Heiner

**DOI:** 10.1061/JHEND8.HYENG-13871

© ASCE 2024

[www.ascelibrary.org](http://www.ascelibrary.org)

## Additional Uplift Due to Detached Jets

Eqs. (5)-(9) predict the uplift pressure head for jets that remain attached to the chute floor downstream from an offset into the flow. If the flow detaches from the floor due to a large offset that forces the flow into the air so that the jet breaks up before landing downstream, the uplift pressure will be increased due to the momentum thrust needed to deflect the jet. Some of the increased pressure on the chute floor is transmitted into the joint.

Data collected from detached jets were used to determine the uplift pressure increase in relation to  $h_v$ ,  $h_v^*$ , and the normalized uplift pressure head for the attached condition. The best relation for predicting the additional uplift is shown in Fig. S1:

$$\frac{\Delta H_{\text{det}}}{h_v^*} = 0.0382 \left( \frac{y}{s} \frac{\beta^{1.35}}{F^{0.5}} \right)^{0.90} \quad (\text{S1})$$

which is fit using data collected in the range  $0 < \beta < 5.5$  with  $F$  being the Froude number immediately upstream from the joint. Larger values of  $\beta$  produce a smaller increase. The maximum value of  $\beta$  for which a detached jet could be tested was 9.71. Once the increase due to detachment is computed, the total uplift would be  $\Delta H + \Delta H_{\text{det}}$ , with  $\Delta H$  obtained from Eq. (5).

An alternative relation for predicting the additional uplift is

$$\frac{\Delta H_{\text{det}}}{h_v} = 0.0240 \left( \frac{y}{s} \frac{\beta^{1.35}}{F^{0.5}} \right)^{0.724} \quad (\text{S2})$$

illustrated in Fig. S2. The data in Figs. S1-S2 were all obtained at detached flow conditions for which a corresponding attached flow case could be established and tested. Either equation can also be applied to very shallow flow depths for which attached flow is impossible to maintain. Eight tests were conducted in such conditions, with offsets  $h = 8$  to  $10$  mm and four values of  $\beta$ : 0.07, 0.47, 0.97 and 9.0. Observed uplift pressures were within 10% of predicted values from Eq. (S1) for most of the tests, except the  $\beta = 9.0$  case and two low-flow tests with  $y/h < 1$ . Errors in these cases were up to  $\pm 40\%$ , but these are all situations that produce very little actual uplift. For the cases with  $y/h < 1$ , the predicted uplift was computed assuming  $\alpha^* = 1.0$ , since Eq. (4) computes  $\alpha^*$  values greater than 1 that are physically inconsistent with a flow that is thinner than the offset height.

One can estimate whether the chute flow will be naturally detached by applying techniques for estimating the launch angle and throw distance of jets at spillway aerator ramps (Falvey 1990; Pfister and Hager 2010). The chute slope is designated  $\theta$  ( $+15^\circ$  for the laboratory chute), and the perpendicularly offset face is positioned at  $\theta_o = \theta - 90^\circ = -75^\circ$ , with the negative angle indicating that the offset would direct the jet upward, above horizontal (Fig. S3). The launch angle of the jet is  $\theta_e = \theta_i(1 - A_r) + \theta_o A_r$ , with the weighting factor  $A_r = 0.48(y/h)^{0.4}$  for a perpendicular offset (equation fit to curve in Falvey 1990, originally from Pan et al. 1980). Note that the sign of  $\theta_e$  should be preserved; it will be negative if the launch angle is above horizontal. The launch angle relative to the chute floor is then  $\alpha' = \theta - \theta_e$ . The Froude number at the launch point is  $F = V/(gy)^{0.5}$ . The throw distance of the jet parallel to the chute floor can be estimated from an empirical equation developed by Pfister and Hager (2010), which is simplified for the case of no offset downstream from the launch point to  $L = h(0.77)F^2(\tan \alpha')(1 + \sin \theta)^{1.5}$ . In the air, the thinning of the intact core of the jet over this throw distance can be estimated as  $2T/L$

where  $T_i$  is a measure of vertical turbulence intensity (perpendicular to chute floor) relative to mean velocity that should range from about 0.03 to 0.06 (Falvey 1990; Auel et al. 2014). The thickness of the remaining jet core at the landing point is then  $y-2T_iL$ . If the computed core thickness is near zero or negative, the jet can be considered disintegrated at the landing point, which will allow air penetration and detached flow. This calculation was applied to the test data and was found to provide a reasonable indication of attached vs. detached jet conditions; however, regardless of the value assumed for  $T_i$ , there were a few poorly predicted cases associated with large gap widths, small offset heights, or both (i.e., large  $\beta$ ). For these situations, the launch angle may be poorly predicted because the method assumes a solid bottom boundary upstream from the offset. This is consistent with the difference in additional detached uplift seen in Fig. S1 and S2 for  $\beta$  values above 5.5, and the range of  $\beta$  values associated with the offset-height scale effect discussed earlier.

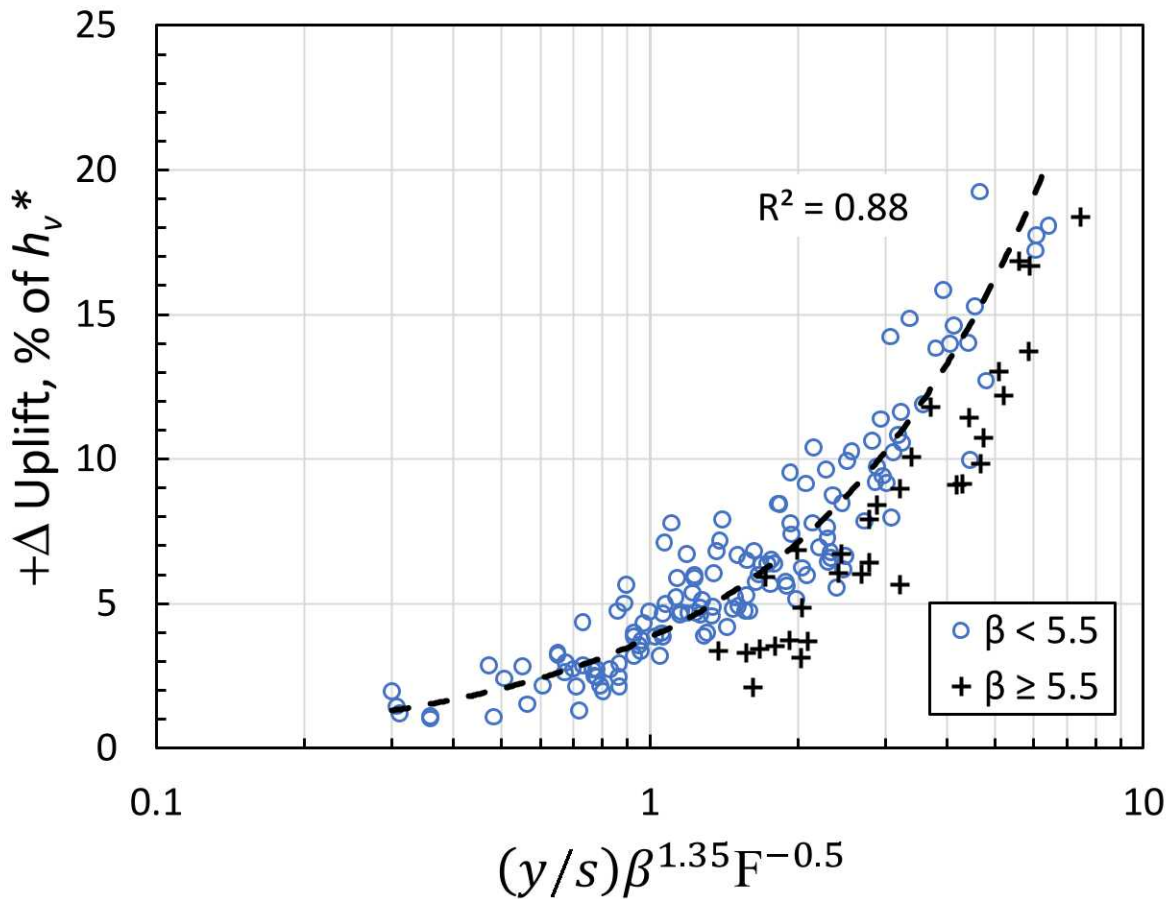

**Fig. S1.** Additional uplift due to jet detachment, relative to  $h_v^*$ . This relation was developed using data in the range of  $0.29 < y/s < 178$ ,  $0.044 < \beta < 9.71$ , and  $7.6 < F < 13.1$ .

Using the estimated launch angle, another empirical relation for the additional uplift is

$$\frac{\Delta H_{\text{det}}}{\Delta H} = 0.000140 \left( \frac{(\tan \alpha')^{0.75}}{e^{0.1\beta}} \right)^{-2.52} \quad (\text{S3})$$

where  $\Delta H$  is the uplift calculated for attached flow conditions. This relation is shown in Fig. S4. Note that no difference was noted in this relation for different ranges of  $\beta$ .

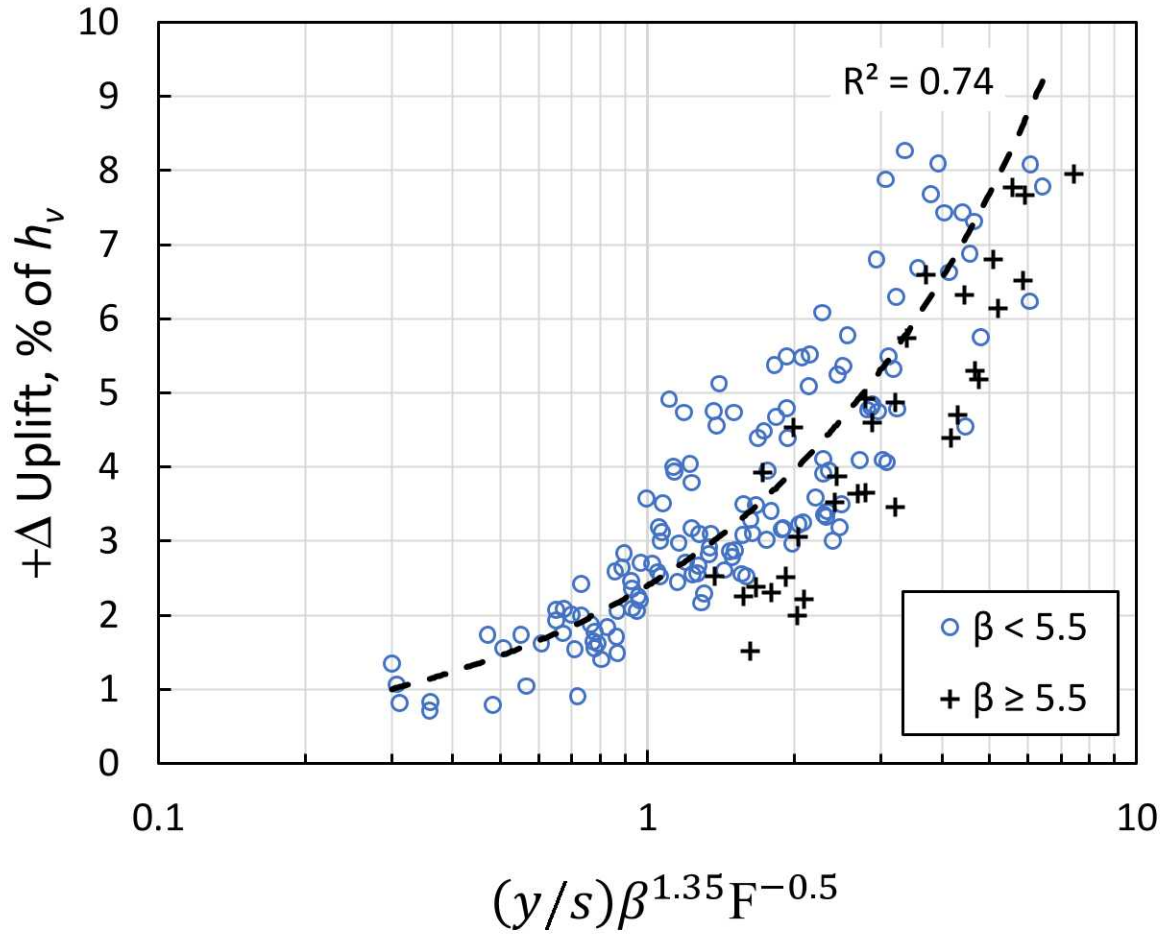

**Fig. S2.** Additional uplift due to jet detachment, relative to  $h_v$ . This relation was developed using data in the range of  $0.29 < y/s < 178$ ,  $0.044 < \beta < 9.71$ , and  $7.6 < F < 13.1$ .

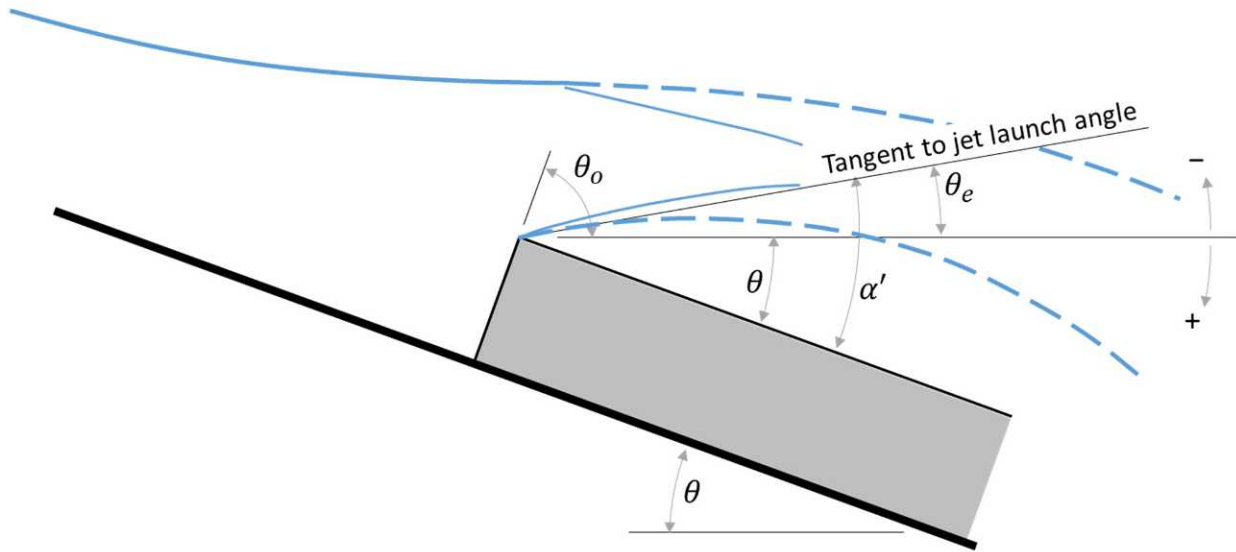

Fig. S3. Schematic diagram and definition of variables for jet launching free from an offset into the flow.

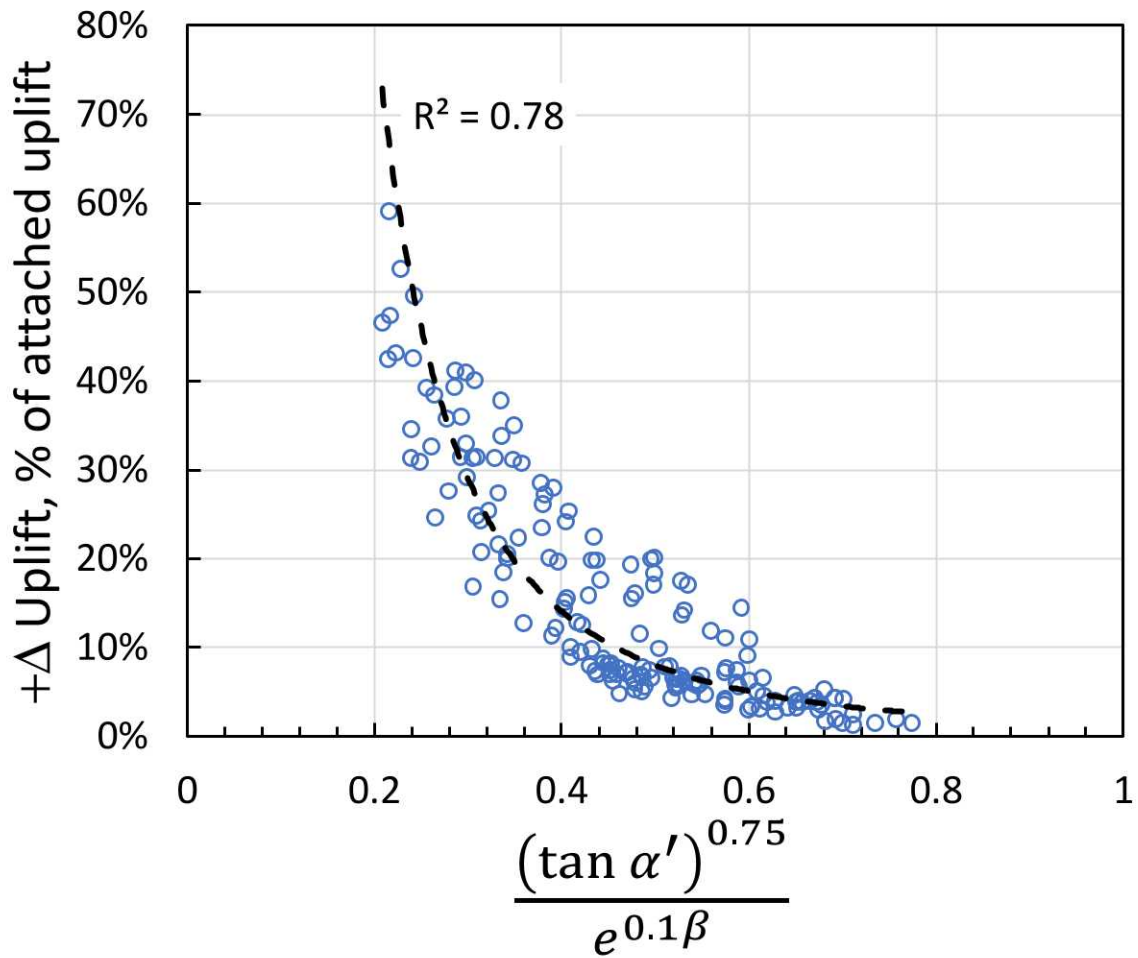

Fig. S4. Additional uplift due to jet detachment, relative to attached uplift, with  $e = 2.718$ , the base of natural logarithms. This relation is applicable for  $14^\circ < \alpha' < 39^\circ$  and  $0.044 < \beta < 9.71$ .

## Expanded-Gap Joint Concept

Because maximum uplift pressure occurs as  $s$  and  $\beta$  approach zero, a joint designed to prevent this is desirable. One concept is illustrated in Fig. S5, incorporating an initial offset away from the flow, a keyway to prevent differential movement of the downstream slab into the flow, and a joint filler to seal the joint. Other features, such as dowel pins and embedded waterstops could also be included but are not essential to the concept. With this joint design, even if the keyway fails so that the downstream slab can become offset into the flow, the joint filler material is removed, and the joint is compressed to a zero gap at the base, the expanded gap will keep  $\beta$  from being reduced to zero. Testing confirms that the effective  $\beta$  value of a joint is determined by the gap width at the chute surface, so maintaining a gap width greater than zero there will produce less uplift than a comparable offset joint having  $\beta$  near zero. Depending on the anchorage system capacity planned for a chute and the size of potential offsets that might develop, the designer can use the uplift equations to determine the expanded gap size needed to keep uplift within a manageable range.

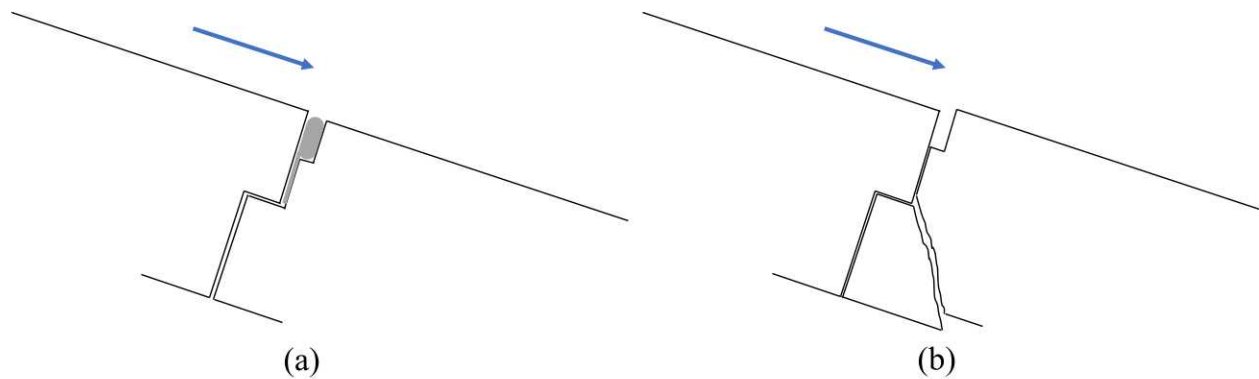

**Fig. S5.** Concept for a joint with an expanded gap width at the chute surface, showing (a) the constructed joint with an initial offset away from the flow, a keyway to prevent differential movement of the downstream slab into the flow, and joint filler material (light gray); and (b) the joint after failure of the keyway, washout of filler material, compression of the joint, and offsetting of the downstream slab into the flow. In this offset condition, the expanded gap at the chute surface still prevents a  $\beta = 0$  condition.

## Experimental Data

**Table S1.** Test data for uplift pressure at regular square-edged joints. Sorted by  $\beta$ ,  $h$ , and  $q$ , with detached-only and rough-floor tests at bottom.

| Offset | Gap  | Discharge |                   |      | Depth | Velocity |          |            | Channel          | Boundary               | Attached   | Total                       | Approach     |
|--------|------|-----------|-------------------|------|-------|----------|----------|------------|------------------|------------------------|------------|-----------------------------|--------------|
| $h$    | $s$  | $\beta$   | per unit<br>width | $y$  | $V$   | $N$      | $\alpha$ | $\alpha^*$ | velocity<br>head | layer velocity<br>head | uplift     | detached<br>uplift          | flow surface |
| mm     | mm   | -         | $q$               | cm   | m/s   | -        | -        | -          | $h_v$            | $h_v^*$                | $\Delta H$ | $\Delta H + \Delta H_{det}$ | -            |
|        |      |           | $m^2/s$           |      |       |          |          |            | m                | m                      | m          | m                           |              |
| 10.19  | 0.45 | 0.044     | 0.178             | 3.09 | 5.77  | 8.03     | 1.035    | 0.684      | 1.699            | 1.162                  | 0.897      | 0.911                       | acrylic      |
| 10.19  | 0.45 | 0.044     | 0.273             | 4.42 | 6.17  | 8.28     | 1.033    | 0.607      | 1.942            | 1.179                  | 1.003      | 1.036                       | acrylic      |
| 10.19  | 0.45 | 0.044     | 0.597             | 7.98 | 7.48  | 8.55     | 1.032    | 0.501      | 2.853            | 1.429                  | 1.343      | 1.424                       | acrylic      |
| 10.33  | 0.47 | 0.045     | 0.174             | 3.02 | 5.78  | 7.81     | 1.037    | 0.687      | 1.705            | 1.171                  | 0.937      | 0.960                       | acrylic      |
| 10.33  | 0.47 | 0.045     | 0.316             | 4.98 | 6.35  | 8.58     | 1.031    | 0.595      | 2.058            | 1.224                  | 1.115      | -                           | acrylic      |
| 10.33  | 0.47 | 0.045     | 0.593             | 7.80 | 7.60  | 9.67     | 1.025    | 0.548      | 2.944            | 1.612                  | 1.504      | 1.580                       | acrylic      |
| 10.38  | 0.80 | 0.077     | 0.145             | 2.62 | 5.55  | 8.45     | 1.032    | 0.744      | 1.569            | 1.167                  | 0.883      | 0.900                       | acrylic      |
| 10.38  | 0.80 | 0.077     | 0.175             | 3.01 | 5.81  | 8.40     | 1.033    | 0.706      | 1.719            | 1.213                  | 0.957      | 0.969                       | acrylic      |
| 10.38  | 0.80 | 0.077     | 0.244             | 4.04 | 6.04  | 8.77     | 1.030    | 0.647      | 1.862            | 1.205                  | 1.054      | 1.083                       | acrylic      |
| 10.38  | 0.80 | 0.077     | 0.310             | 4.54 | 6.82  | 8.61     | 1.031    | 0.617      | 2.375            | 1.465                  | 1.342      | 1.383                       | acrylic      |
| 10.38  | 0.80 | 0.077     | 0.327             | 5.06 | 6.46  | 8.82     | 1.030    | 0.601      | 2.129            | 1.280                  | 1.155      | 1.196                       | acrylic      |
| 10.38  | 0.80 | 0.077     | 0.595             | 7.66 | 7.77  | 9.28     | 1.027    | 0.539      | 3.075            | 1.656                  | 1.541      | -                           | acrylic      |
| 10.38  | 0.80 | 0.077     | 0.749             | 8.89 | 8.43  | 9.72     | 1.025    | 0.528      | 3.620            | 1.912                  | 1.834      | 1.923                       | acrylic      |
| 9.88   | 1.49 | 0.15      | 0.125             | 2.33 | 5.36  | 8.63     | 1.031    | 0.765      | 1.466            | 1.122                  | 0.807      | 0.819                       | acrylic      |
| 9.88   | 1.49 | 0.15      | 0.235             | 3.91 | 6.01  | 8.42     | 1.032    | 0.632      | 1.841            | 1.164                  | 0.993      | 1.031                       | acrylic      |
| 9.88   | 1.49 | 0.15      | 0.569             | 6.01 | 9.46  | 8.06     | 1.035    | 0.528      | 4.567            | 2.413                  | 2.181      | 2.301                       | acrylic      |
| 9.88   | 1.49 | 0.15      | 0.572             | 7.65 | 7.48  | 8.81     | 1.030    | 0.513      | 2.851            | 1.463                  | 1.356      | 1.444                       | acrylic      |
| 10.26  | 1.59 | 0.16      | 0.165             | 2.90 | 5.68  | 8.14     | 1.034    | 0.705      | 1.648            | 1.162                  | 0.923      | -                           | acrylic      |
| 10.26  | 1.59 | 0.16      | 0.370             | 5.53 | 6.69  | 8.42     | 1.032    | 0.567      | 2.284            | 1.294                  | 1.195      | -                           | acrylic      |
| 10.26  | 1.59 | 0.16      | 0.595             | 7.76 | 7.67  | 9.08     | 1.028    | 0.527      | 2.997            | 1.579                  | 1.509      | -                           | acrylic      |
| 9.96   | 2.49 | 0.25      | 0.240             | 3.97 | 6.06  | 8.40     | 1.033    | 0.630      | 1.873            | 1.180                  | 0.910      | 0.939                       | acrylic      |
| 9.96   | 2.49 | 0.25      | 0.406             | 5.09 | 7.97  | 8.82     | 1.030    | 0.591      | 3.238            | 1.915                  | 1.606      | 1.683                       | acrylic      |
| 9.96   | 2.49 | 0.25      | 0.407             | 5.99 | 6.79  | 8.26     | 1.034    | 0.539      | 2.354            | 1.268                  | 1.135      | 1.209                       | acrylic      |
| 9.96   | 2.49 | 0.25      | 0.598             | 7.84 | 7.63  | 8.10     | 1.035    | 0.482      | 2.972            | 1.432                  | 1.370      | 1.467                       | acrylic      |
| 10.37  | 2.79 | 0.27      | 0.153             | 2.67 | 5.73  | 8.13     | 1.035    | 0.729      | 1.673            | 1.220                  | 0.865      | 0.879                       | acrylic      |
| 10.37  | 2.79 | 0.27      | 0.180             | 3.07 | 5.88  | 7.91     | 1.036    | 0.687      | 1.760            | 1.210                  | 0.925      | 0.943                       | acrylic      |
| 10.37  | 2.79 | 0.27      | 0.299             | 4.80 | 6.22  | 8.23     | 1.034    | 0.591      | 1.972            | 1.166                  | 1.029      | 1.073                       | acrylic      |
| 10.37  | 2.79 | 0.27      | 0.306             | 4.80 | 6.37  | 8.00     | 1.036    | 0.583      | 2.071            | 1.207                  | 1.073      | 1.116                       | acrylic      |
| 10.37  | 2.79 | 0.27      | 0.424             | 6.27 | 6.77  | 8.84     | 1.030    | 0.560      | 2.338            | 1.308                  | 1.162      | 1.213                       | acrylic      |
| 10.37  | 2.79 | 0.27      | 0.595             | 7.71 | 7.72  | 9.30     | 1.027    | 0.538      | 3.040            | 1.636                  | 1.475      | 1.552                       | acrylic      |

| Offset<br>$h$ | Gap<br>$s$ | $\beta$ | Discharge<br>per unit<br>width<br>$q$ | Depth<br>$y$ | Velocity<br>$V$ | $N$  | $\alpha$ | $\alpha^*$ | Channel<br>velocity<br>head<br>$h_v$ | Boundary<br>layer velocity<br>head<br>$h_v^*$ | Attached<br>uplift<br>$\Delta H$ | Total<br>detached<br>uplift<br>$\Delta H + \Delta H_{det}$ | Approach<br>flow surface |
|---------------|------------|---------|---------------------------------------|--------------|-----------------|------|----------|------------|--------------------------------------|-----------------------------------------------|----------------------------------|------------------------------------------------------------|--------------------------|
| mm            | mm         | -       | m <sup>2</sup> /s                     | cm           | m/s             | -    | -        | -          | m                                    | m                                             | m                                | m                                                          | -                        |
| 10.37         | 2.79       | 0.27    | 0.749                                 | 8.80         | 8.51            | 9.77 | 1.025    | 0.532      | 3.696                                | 1.965                                         | 1.764                            | 1.876                                                      | acrylic                  |
| 3.70          | 1.58       | 0.43    | 0.042                                 | 1.13         | 3.70            | 7.68 | 1.038    | 0.672      | 0.697                                | 0.468                                         | 0.319                            | 0.331                                                      | acrylic                  |
| 3.70          | 1.58       | 0.43    | 0.054                                 | 1.33         | 4.11            | 8.28 | 1.033    | 0.651      | 0.861                                | 0.560                                         | 0.385                            | 0.401                                                      | acrylic                  |
| 3.70          | 1.58       | 0.43    | 0.109                                 | 2.10         | 5.20            | 8.08 | 1.035    | 0.543      | 1.378                                | 0.748                                         | 0.602                            | 0.637                                                      | acrylic                  |
| 3.70          | 1.58       | 0.43    | 0.225                                 | 3.73         | 6.03            | 8.38 | 1.033    | 0.452      | 1.851                                | 0.837                                         | 0.769                            | 0.842                                                      | acrylic                  |
| 3.70          | 1.58       | 0.43    | 0.393                                 | 5.73         | 6.86            | 9.10 | 1.028    | 0.417      | 2.402                                | 1.001                                         | 0.931                            | -                                                          | acrylic                  |
| 10.18         | 4.63       | 0.45    | 0.190                                 | 3.32         | 5.73            | 7.74 | 1.038    | 0.656      | 1.672                                | 1.097                                         | 0.855                            | 0.882                                                      | acrylic                  |
| 10.18         | 4.63       | 0.45    | 0.340                                 | 5.28         | 6.44            | 8.40 | 1.033    | 0.574      | 2.114                                | 1.213                                         | 1.022                            | 1.070                                                      | acrylic                  |
| 10.18         | 4.63       | 0.45    | 0.597                                 | 8.00         | 7.46            | 8.98 | 1.029    | 0.517      | 2.839                                | 1.467                                         | 1.306                            | 1.398                                                      | acrylic                  |
| 10.18         | 4.63       | 0.45    | 0.753                                 | 9.22         | 8.17            | 8.91 | 1.029    | 0.490      | 3.404                                | 1.668                                         | 1.539                            | 1.652                                                      | acrylic                  |
| 9.98          | 5.51       | 0.55    | 0.158                                 | 2.77         | 5.70            | 8.01 | 1.035    | 0.707      | 1.656                                | 1.170                                         | 0.792                            | 0.827                                                      | acrylic                  |
| 9.98          | 5.51       | 0.55    | 0.240                                 | 3.74         | 6.43            | 8.22 | 1.034    | 0.638      | 2.107                                | 1.345                                         | 1.014                            | 1.066                                                      | acrylic                  |
| 9.98          | 5.51       | 0.55    | 0.392                                 | 5.82         | 6.73            | 8.10 | 1.035    | 0.539      | 2.311                                | 1.244                                         | 1.033                            | 1.114                                                      | acrylic                  |
| 9.98          | 5.51       | 0.55    | 0.403                                 | 5.02         | 8.03            | 8.39 | 1.033    | 0.580      | 3.288                                | 1.906                                         | 1.501                            | 1.590                                                      | acrylic                  |
| 9.98          | 5.51       | 0.55    | 0.462                                 | 6.57         | 7.04            | 8.57 | 1.031    | 0.533      | 2.527                                | 1.348                                         | 1.108                            | 1.194                                                      | acrylic                  |
| 9.98          | 5.51       | 0.55    | 0.464                                 | 6.27         | 7.40            | 8.19 | 1.034    | 0.527      | 2.793                                | 1.473                                         | 1.271                            | -                                                          | acrylic                  |
| 9.98          | 5.51       | 0.55    | 0.597                                 | 7.86         | 7.60            | 8.29 | 1.033    | 0.490      | 2.948                                | 1.444                                         | 1.279                            | -                                                          | acrylic                  |
| 11.06         | 6.14       | 0.56    | 0.183                                 | 3.17         | 5.77            | 8.11 | 1.035    | 0.701      | 1.697                                | 1.189                                         | 0.853                            | 0.869                                                      | acrylic                  |
| 9.98          | 5.62       | 0.56    | 0.173                                 | 2.97         | 5.83            | 8.32 | 1.033    | 0.698      | 1.734                                | 1.210                                         | 0.797                            | 0.832                                                      | acrylic                  |
| 9.98          | 5.62       | 0.56    | 0.311                                 | 4.82         | 6.45            | 8.82 | 1.030    | 0.603      | 2.120                                | 1.278                                         | 0.958                            | 1.023                                                      | acrylic                  |
| 9.98          | 5.62       | 0.56    | 0.465                                 | 5.37         | 8.65            | 7.48 | 1.040    | 0.529      | 3.813                                | 2.019                                         | 1.705                            | 1.803                                                      | acrylic                  |
| 9.86          | 6.24       | 0.63    | 0.170                                 | 2.94         | 5.80            | 8.07 | 1.035    | 0.690      | 1.713                                | 1.182                                         | 0.795                            | 0.827                                                      | acrylic                  |
| 9.86          | 6.24       | 0.63    | 0.303                                 | 4.77         | 6.36            | 8.67 | 1.031    | 0.598      | 2.061                                | 1.232                                         | 0.960                            | 1.020                                                      | acrylic                  |
| 9.86          | 6.24       | 0.63    | 0.596                                 | 7.68         | 7.75            | 8.95 | 1.029    | 0.517      | 3.065                                | 1.585                                         | 1.339                            | 1.448                                                      | acrylic                  |
| 9.86          | 6.24       | 0.63    | 0.751                                 | 8.81         | 8.53            | 9.89 | 1.024    | 0.527      | 3.707                                | 1.955                                         | 1.628                            | 1.757                                                      | acrylic                  |
| 12.11         | 8.10       | 0.67    | 0.184                                 | 3.17         | 5.80            | 8.39 | 1.033    | 0.732      | 1.716                                | 1.256                                         | 0.826                            | 0.860                                                      | acrylic                  |
| 12.11         | 8.10       | 0.67    | 0.222                                 | 3.69         | 6.02            | 7.87 | 1.037    | 0.678      | 1.850                                | 1.254                                         | 0.888                            | 0.922                                                      | acrylic                  |
| 12.11         | 8.10       | 0.67    | 0.430                                 | 6.19         | 6.94            | 8.91 | 1.029    | 0.594      | 2.453                                | 1.458                                         | 1.113                            | 1.183                                                      | acrylic                  |
| 12.11         | 8.10       | 0.67    | 0.432                                 | 6.42         | 6.72            | 8.73 | 1.030    | 0.581      | 2.306                                | 1.340                                         | 1.097                            | 1.168                                                      | acrylic                  |
| 12.11         | 8.10       | 0.67    | 0.592                                 | 7.80         | 7.59            | 8.84 | 1.030    | 0.547      | 2.939                                | 1.608                                         | 1.332                            | 1.425                                                      | acrylic                  |
| 12.11         | 8.10       | 0.67    | 0.760                                 | 9.38         | 8.10            | 9.01 | 1.029    | 0.520      | 3.346                                | 1.741                                         | 1.506                            | 1.618                                                      | acrylic                  |
| 12.11         | 8.10       | 0.67    | 0.884                                 | 10.20        | 8.66            | 9.32 | 1.027    | 0.517      | 3.825                                | 1.978                                         | 1.748                            | 1.869                                                      | acrylic                  |
| 9.83          | 7.37       | 0.75    | 0.181                                 | 3.10         | 5.84            | 9.02 | 1.029    | 0.702      | 1.740                                | 1.222                                         | 0.807                            | 0.833                                                      | acrylic                  |
| 9.83          | 7.37       | 0.75    | 0.327                                 | 4.56         | 7.18            | 7.84 | 1.037    | 0.577      | 2.630                                | 1.516                                         | 1.191                            | 1.261                                                      | acrylic                  |
| 9.83          | 7.37       | 0.75    | 0.330                                 | 5.05         | 6.53            | 8.65 | 1.031    | 0.584      | 2.176                                | 1.271                                         | 0.960                            | 1.023                                                      | acrylic                  |



| Offset<br>$h$ | Gap<br>$s$ | $\beta$ | Discharge<br>per unit<br>width<br>$q$ | Depth<br>$y$ | Velocity<br>$V$ | $N$  | $\alpha$ | $\alpha^*$ | Channel<br>velocity<br>head<br>$h_v$ | Boundary<br>layer velocity<br>head<br>$h_v^*$ | Attached<br>uplift<br>$\Delta H$ | Total<br>detached<br>uplift<br>$\Delta H + \Delta H_{det}$ | Approach<br>flow surface |
|---------------|------------|---------|---------------------------------------|--------------|-----------------|------|----------|------------|--------------------------------------|-----------------------------------------------|----------------------------------|------------------------------------------------------------|--------------------------|
| mm            | mm         | -       | m <sup>2</sup> /s                     | cm           | m/s             | -    | -        | -          | m                                    | m                                             | m                                | m                                                          | -                        |
| 9.83          | 7.37       | 0.75    | 0.566                                 | 7.55         | 7.51            | 8.86 | 1.030    | 0.516      | 2.873                                | 1.483                                         | 1.201                            | 1.298                                                      | acrylic                  |
| 9.83          | 7.37       | 0.75    | 0.568                                 | 6.71         | 8.46            | 9.74 | 1.025    | 0.567      | 3.648                                | 2.069                                         | 1.601                            | 1.717                                                      | acrylic                  |
| 9.83          | 7.37       | 0.75    | 0.568                                 | 7.08         | 8.03            | 9.35 | 1.027    | 0.545      | 3.284                                | 1.790                                         | 1.395                            | 1.502                                                      | acrylic                  |
| 9.83          | 7.37       | 0.75    | 0.569                                 | 6.08         | 9.36            | 8.28 | 1.033    | 0.534      | 4.464                                | 2.384                                         | 2.019                            | 2.132                                                      | acrylic                  |
| 9.83          | 7.37       | 0.75    | 0.569                                 | 5.86         | 9.72            | 8.10 | 1.035    | 0.534      | 4.817                                | 2.574                                         | 2.033                            | 2.167                                                      | acrylic                  |
| 4.59          | 3.56       | 0.78    | 0.071                                 | 1.58         | 4.48            | 8.15 | 1.034    | 0.655      | 1.024                                | 0.671                                         | 0.467                            | 0.488                                                      | acrylic                  |
| 4.59          | 3.56       | 0.78    | 0.080                                 | 1.68         | 4.77            | 7.80 | 1.037    | 0.629      | 1.161                                | 0.731                                         | 0.500                            | 0.532                                                      | acrylic                  |
| 4.59          | 3.56       | 0.78    | 0.154                                 | 2.74         | 5.64            | 8.27 | 1.034    | 0.540      | 1.623                                | 0.877                                         | 0.671                            | 0.721                                                      | acrylic                  |
| 4.59          | 3.56       | 0.78    | 0.326                                 | 5.00         | 6.52            | 8.70 | 1.031    | 0.452      | 2.169                                | 0.980                                         | 0.849                            | 0.952                                                      | acrylic                  |
| 9.87          | 9.59       | 0.97    | 0.165                                 | 2.86         | 5.76            | 8.07 | 1.035    | 0.696      | 1.693                                | 1.179                                         | 0.754                            | 0.782                                                      | acrylic                  |
| 9.87          | 9.59       | 0.97    | 0.167                                 | 2.88         | 5.79            | 8.41 | 1.032    | 0.705      | 1.710                                | 1.205                                         | 0.756                            | 0.791                                                      | acrylic                  |
| 9.87          | 9.59       | 0.97    | 0.320                                 | 5.03         | 6.35            | 8.52 | 1.032    | 0.581      | 2.057                                | 1.196                                         | 0.912                            | 0.984                                                      | acrylic                  |
| 9.87          | 9.59       | 0.97    | 0.597                                 | 7.96         | 7.50            | 9.25 | 1.027    | 0.522      | 2.869                                | 1.497                                         | 1.193                            | 1.311                                                      | acrylic                  |
| 9.87          | 9.59       | 0.97    | 0.759                                 | 9.17         | 8.28            | 9.56 | 1.026    | 0.509      | 3.494                                | 1.780                                         | 1.415                            | 1.557                                                      | acrylic                  |
| 11.12         | 11.34      | 1.02    | 0.168                                 | 2.91         | 5.78            | 8.93 | 1.029    | 0.745      | 1.705                                | 1.271                                         | 0.786                            | 0.813                                                      | acrylic                  |
| 11.12         | 11.34      | 1.02    | 0.170                                 | 2.94         | 5.77            | 8.06 | 1.035    | 0.721      | 1.698                                | 1.225                                         | 0.785                            | 0.809                                                      | acrylic                  |
| 11.12         | 11.34      | 1.02    | 0.313                                 | 4.87         | 6.43            | 8.84 | 1.030    | 0.624      | 2.107                                | 1.315                                         | 0.957                            | 1.012                                                      | acrylic                  |
| 11.12         | 11.34      | 1.02    | 0.331                                 | 5.06         | 6.55            | 8.82 | 1.030    | 0.615      | 2.184                                | 1.343                                         | 0.975                            | -                                                          | acrylic                  |
| 11.12         | 11.34      | 1.02    | 0.452                                 | 6.50         | 6.95            | 9.17 | 1.028    | 0.577      | 2.466                                | 1.423                                         | 1.094                            | 1.167                                                      | acrylic                  |
| 11.12         | 11.34      | 1.02    | 0.599                                 | 7.85         | 7.63            | 9.13 | 1.028    | 0.541      | 2.968                                | 1.606                                         | 1.278                            | 1.367                                                      | acrylic                  |
| 2.23          | 2.58       | 1.16    | 0.107                                 | 2.05         | 5.19            | 7.95 | 1.036    | 0.448      | 1.375                                | 0.616                                         | 0.435                            | 0.500                                                      | acrylic                  |
| 2.23          | 2.58       | 1.16    | 0.251                                 | 4.06         | 6.19            | 8.30 | 1.033    | 0.362      | 1.956                                | 0.708                                         | 0.588                            | 0.710                                                      | acrylic                  |
| 2.23          | 2.58       | 1.16    | 0.589                                 | 7.00         | 8.41            | 9.55 | 1.026    | 0.347      | 3.609                                | 1.253                                         | 0.995                            | -                                                          | acrylic                  |
| 6.13          | 7.52       | 1.23    | 0.119                                 | 2.25         | 5.31            | 7.88 | 1.036    | 0.632      | 1.436                                | 0.908                                         | 0.588                            | 0.631                                                      | acrylic                  |
| 6.13          | 7.52       | 1.23    | 0.571                                 | 6.08         | 9.40            | 8.20 | 1.034    | 0.447      | 4.505                                | 2.013                                         | 1.624                            | 1.809                                                      | acrylic                  |
| 6.13          | 7.52       | 1.23    | 0.573                                 | 7.59         | 7.54            | 9.28 | 1.027    | 0.456      | 2.903                                | 1.322                                         | 1.035                            | 1.167                                                      | acrylic                  |
| 5.79          | 7.41       | 1.28    | 0.106                                 | 1.98         | 5.33            | 7.99 | 1.036    | 0.653      | 1.449                                | 0.946                                         | 0.603                            | 0.640                                                      | acrylic                  |
| 5.79          | 7.41       | 1.28    | 0.106                                 | 1.98         | 5.33            | 7.99 | 1.036    | 0.653      | 1.449                                | 0.946                                         | 0.579                            | -                                                          | acrylic                  |
| 5.79          | 7.41       | 1.28    | 0.106                                 | 1.98         | 5.33            | 7.99 | 1.036    | 0.653      | 1.449                                | 0.946                                         | 0.583                            | -                                                          | acrylic                  |
| 5.79          | 7.41       | 1.28    | 0.106                                 | 1.98         | 5.34            | 7.79 | 1.037    | 0.646      | 1.452                                | 0.938                                         | 0.587                            | 0.630                                                      | acrylic                  |
| 5.79          | 7.41       | 1.28    | 0.140                                 | 2.49         | 5.62            | 8.21 | 1.034    | 0.607      | 1.609                                | 0.976                                         | 0.631                            | -                                                          | acrylic                  |
| 5.79          | 7.41       | 1.28    | 0.305                                 | 4.74         | 6.43            | 8.68 | 1.031    | 0.498      | 2.108                                | 1.050                                         | 0.793                            | 0.895                                                      | acrylic                  |
| 5.79          | 7.41       | 1.28    | 0.591                                 | 7.64         | 7.74            | 9.14 | 1.028    | 0.441      | 3.052                                | 1.346                                         | 1.094                            | -                                                          | acrylic                  |
| 10.16         | 14.69      | 1.45    | 0.173                                 | 3.01         | 5.77            | 8.40 | 1.033    | 0.701      | 1.697                                | 1.189                                         | 0.703                            | 0.749                                                      | acrylic                  |
| 10.16         | 14.69      | 1.45    | 0.313                                 | 4.85         | 6.46            | 8.82 | 1.030    | 0.605      | 2.125                                | 1.286                                         | 0.850                            | 0.934                                                      | acrylic                  |

| Offset<br>$h$ | Gap<br>$s$ | $\beta$ | Discharge<br>per unit<br>width<br>$q$ | Depth<br>$y$ | Velocity<br>$V$ | $N$  | $\alpha$ | $\alpha^*$ | Channel<br>velocity<br>head<br>$h_v$ | Boundary<br>layer velocity<br>head<br>$h_v^*$ | Attached<br>uplift<br>$\Delta H$ | Total<br>detached<br>uplift<br>$\Delta H + \Delta H_{det}$ | Approach<br>flow surface |
|---------------|------------|---------|---------------------------------------|--------------|-----------------|------|----------|------------|--------------------------------------|-----------------------------------------------|----------------------------------|------------------------------------------------------------|--------------------------|
| mm            | mm         | -       | m <sup>2</sup> /s                     | cm           | m/s             | -    | -        | -          | m                                    | m                                             | m                                | m                                                          | -                        |
| 10.16         | 14.69      | 1.45    | 0.590                                 | 7.67         | 7.69            | 8.97 | 1.029    | 0.523      | 3.015                                | 1.577                                         | 1.153                            | 1.298                                                      | acrylic                  |
| 10.16         | 14.69      | 1.45    | 0.744                                 | 8.71         | 8.54            | 8.72 | 1.030    | 0.492      | 3.721                                | 1.831                                         | 1.380                            | 1.578                                                      | acrylic                  |
| 3.45          | 5.51       | 1.60    | 0.038                                 | 1.08         | 3.52            | 6.75 | 1.048    | 0.632      | 0.633                                | 0.400                                         | 0.216                            | 0.247                                                      | acrylic                  |
| 3.45          | 5.51       | 1.60    | 0.049                                 | 1.23         | 3.98            | 7.71 | 1.038    | 0.633      | 0.806                                | 0.510                                         | 0.258                            | 0.288                                                      | acrylic                  |
| 3.45          | 5.51       | 1.60    | 0.093                                 | 1.85         | 4.99            | 8.08 | 1.035    | 0.555      | 1.271                                | 0.705                                         | 0.384                            | 0.444                                                      | acrylic                  |
| 3.45          | 5.51       | 1.60    | 0.182                                 | 3.09         | 5.90            | 8.02 | 1.035    | 0.456      | 1.777                                | 0.811                                         | 0.499                            | -                                                          | acrylic                  |
| 3.45          | 5.51       | 1.60    | 0.237                                 | 3.89         | 6.08            | 8.68 | 1.031    | 0.447      | 1.886                                | 0.842                                         | 0.546                            | -                                                          | acrylic                  |
| 3.45          | 5.51       | 1.60    | 0.248                                 | 4.01         | 6.19            | 8.45 | 1.032    | 0.432      | 1.952                                | 0.844                                         | 0.562                            | -                                                          | acrylic                  |
| 3.45          | 5.51       | 1.60    | 0.393                                 | 5.92         | 6.64            | 8.02 | 1.035    | 0.358      | 2.251                                | 0.806                                         | 0.616                            | -                                                          | acrylic                  |
| 3.45          | 5.51       | 1.60    | 0.396                                 | 4.79         | 8.26            | 7.86 | 1.037    | 0.380      | 3.482                                | 1.323                                         | 0.930                            | 1.185                                                      | acrylic                  |
| 3.45          | 5.51       | 1.60    | 0.587                                 | 6.61         | 8.87            | 7.44 | 1.040    | 0.316      | 4.015                                | 1.271                                         | 0.992                            | -                                                          | acrylic                  |
| 3.45          | 5.51       | 1.60    | 0.600                                 | 7.85         | 7.64            | 8.10 | 1.035    | 0.325      | 2.978                                | 0.969                                         | 0.733                            | -                                                          | acrylic                  |
| 9.82          | 17.40      | 1.77    | 0.166                                 | 2.87         | 5.77            | 8.49 | 1.032    | 0.706      | 1.697                                | 1.199                                         | 0.655                            | 0.714                                                      | acrylic                  |
| 9.82          | 17.40      | 1.77    | 0.307                                 | 4.80         | 6.39            | 8.62 | 1.031    | 0.594      | 2.084                                | 1.237                                         | 0.793                            | 0.885                                                      | acrylic                  |
| 9.82          | 17.40      | 1.77    | 0.592                                 | 7.59         | 7.79            | 9.44 | 1.026    | 0.536      | 3.096                                | 1.659                                         | 1.094                            | 1.264                                                      | acrylic                  |
| 6.06          | 11.84      | 1.95    | 0.092                                 | 1.87         | 4.93            | 7.73 | 1.038    | 0.671      | 1.240                                | 0.832                                         | 0.444                            | 0.492                                                      | acrylic                  |
| 6.06          | 11.84      | 1.95    | 0.237                                 | 3.85         | 6.16            | 8.56 | 1.031    | 0.540      | 1.934                                | 1.044                                         | 0.655                            | 0.758                                                      | acrylic                  |
| 6.06          | 11.84      | 1.95    | 0.527                                 | 6.75         | 7.81            | 9.20 | 1.028    | 0.468      | 3.108                                | 1.456                                         | 0.992                            | -                                                          | acrylic                  |
| 6.06          | 11.84      | 1.95    | 0.593                                 | 7.23         | 8.19            | 9.05 | 1.029    | 0.452      | 3.423                                | 1.548                                         | 1.070                            | 1.267                                                      | acrylic                  |
| 3.71          | 7.76       | 2.09    | 0.056                                 | 1.35         | 4.13            | 7.90 | 1.036    | 0.635      | 0.869                                | 0.552                                         | 0.292                            | 0.332                                                      | acrylic                  |
| 3.71          | 7.76       | 2.09    | 0.111                                 | 2.11         | 5.26            | 7.79 | 1.037    | 0.531      | 1.410                                | 0.749                                         | 0.443                            | 0.521                                                      | acrylic                  |
| 3.71          | 7.76       | 2.09    | 0.230                                 | 3.78         | 6.08            | 8.45 | 1.032    | 0.453      | 1.887                                | 0.855                                         | 0.561                            | 0.686                                                      | acrylic                  |
| 3.71          | 7.76       | 2.09    | 0.451                                 | 6.34         | 7.12            | 9.01 | 1.029    | 0.400      | 2.585                                | 1.034                                         | 0.703                            | -                                                          | acrylic                  |
| 3.71          | 7.76       | 2.09    | 0.598                                 | 7.60         | 7.87            | 9.05 | 1.029    | 0.378      | 3.158                                | 1.194                                         | 0.834                            | -                                                          | acrylic                  |
| 11.70         | 31.83      | 2.72    | 0.156                                 | 2.74         | 5.68            | 8.14 | 1.034    | 0.756      | 1.645                                | 1.243                                         | 0.549                            | 0.607                                                      | acrylic                  |
| 11.52         | 31.39      | 2.73    | 0.213                                 | 3.55         | 5.99            | 8.71 | 1.031    | 0.699      | 1.829                                | 1.279                                         | 0.618                            | 0.705                                                      | acrylic                  |
| 11.52         | 31.39      | 2.73    | 0.290                                 | 4.58         | 6.33            | 8.58 | 1.031    | 0.637      | 2.042                                | 1.300                                         | 0.688                            | 0.797                                                      | acrylic                  |
| 11.52         | 31.39      | 2.73    | 0.599                                 | 7.81         | 7.68            | 8.92 | 1.029    | 0.541      | 3.005                                | 1.625                                         | 0.948                            | 1.137                                                      | acrylic                  |
| 12.77         | 37.68      | 2.95    | 0.598                                 | 7.92         | 7.55            | 8.83 | 1.030    | 0.554      | 2.903                                | 1.608                                         | 0.826                            | 1.055                                                      | acrylic                  |
| 6.19          | 19.24      | 3.11    | 0.084                                 | 1.72         | 4.90            | 8.01 | 1.035    | 0.706      | 1.224                                | 0.864                                         | 0.343                            | 0.401                                                      | acrylic                  |
| 6.19          | 19.24      | 3.11    | 0.167                                 | 2.88         | 5.82            | 8.46 | 1.032    | 0.599      | 1.725                                | 1.033                                         | 0.482                            | 0.576                                                      | acrylic                  |
| 6.19          | 19.24      | 3.11    | 0.330                                 | 5.04         | 6.55            | 8.98 | 1.029    | 0.511      | 2.185                                | 1.116                                         | 0.573                            | 0.749                                                      | acrylic                  |
| 6.19          | 19.24      | 3.11    | 0.595                                 | 7.63         | 7.79            | 9.27 | 1.027    | 0.456      | 3.093                                | 1.409                                         | 0.763                            | 1.013                                                      | acrylic                  |
| 6.19          | 19.24      | 3.11    | 0.753                                 | 8.76         | 8.60            | 9.58 | 1.026    | 0.447      | 3.769                                | 1.686                                         | 0.920                            | -                                                          | acrylic                  |
| 6.06          | 19.47      | 3.21    | 0.096                                 | 1.93         | 4.99            | 7.30 | 1.042    | 0.648      | 1.267                                | 0.821                                         | 0.359                            | 0.424                                                      | acrylic                  |

| Offset<br>$h$ | Gap<br>$s$ | $\beta$ | Discharge<br>per unit<br>width<br>$q$ | Depth<br>$y$ | Velocity<br>$V$ | $N$  | $\alpha$ | $\alpha^*$ | Channel<br>velocity<br>head<br>$h_v$ | Boundary<br>layer velocity<br>head<br>$h_v^*$ | Attached<br>uplift<br>$\Delta H$ | Total<br>detached<br>uplift<br>$\Delta H + \Delta H_{det}$ | Approach<br>flow surface |
|---------------|------------|---------|---------------------------------------|--------------|-----------------|------|----------|------------|--------------------------------------|-----------------------------------------------|----------------------------------|------------------------------------------------------------|--------------------------|
| mm            | mm         | -       | m <sup>2</sup> /s                     | cm           | m/s             | -    | -        | -          | m                                    | m                                             | m                                | m                                                          | -                        |
| 6.06          | 19.47      | 3.21    | 0.572                                 | 7.66         | 7.46            | 8.74 | 1.030    | 0.431      | 2.841                                | 1.225                                         | 0.707                            | 0.928                                                      | acrylic                  |
| 2.61          | 9.21       | 3.53    | 0.038                                 | 1.08         | 3.55            | 7.16 | 1.043    | 0.576      | 0.644                                | 0.371                                         | 0.160                            | 0.195                                                      | acrylic                  |
| 2.61          | 9.21       | 3.53    | 0.148                                 | 2.60         | 5.71            | 8.30 | 1.033    | 0.450      | 1.664                                | 0.749                                         | 0.366                            | 0.480                                                      | acrylic                  |
| 2.61          | 9.21       | 3.53    | 0.590                                 | 7.56         | 7.81            | 9.04 | 1.029    | 0.337      | 3.107                                | 1.046                                         | 0.624                            | -                                                          | acrylic                  |
| 12.32         | 50.70      | 4.11    | 0.213                                 | 3.60         | 5.93            | 8.54 | 1.032    | 0.708      | 1.791                                | 1.268                                         | 0.451                            | 0.535                                                      | acrylic                  |
| 12.32         | 50.70      | 4.11    | 0.348                                 | 5.24         | 6.63            | 8.93 | 1.029    | 0.633      | 2.241                                | 1.418                                         | 0.577                            | 0.713                                                      | acrylic                  |
| 12.32         | 50.70      | 4.11    | 0.590                                 | 7.62         | 7.74            | 8.89 | 1.029    | 0.557      | 3.057                                | 1.702                                         | 0.734                            | 0.987                                                      | acrylic                  |
| 12.31         | 50.90      | 4.14    | 0.159                                 | 2.80         | 5.67            | 8.32 | 1.033    | 0.768      | 1.639                                | 1.258                                         | 0.387                            | 0.452                                                      | acrylic                  |
| 12.21         | 56.12      | 4.60    | 0.165                                 | 2.89         | 5.71            | 8.08 | 1.035    | 0.752      | 1.662                                | 1.249                                         | 0.351                            | 0.418                                                      | acrylic                  |
| 12.11         | 56.26      | 4.64    | 0.223                                 | 3.76         | 5.95            | 8.53 | 1.032    | 0.693      | 1.804                                | 1.251                                         | 0.414                            | 0.493                                                      | acrylic                  |
| 12.11         | 56.26      | 4.64    | 0.355                                 | 5.32         | 6.67            | 8.72 | 1.030    | 0.620      | 2.268                                | 1.405                                         | 0.521                            | 0.640                                                      | acrylic                  |
| 12.11         | 56.26      | 4.64    | 0.589                                 | 7.62         | 7.73            | 9.11 | 1.028    | 0.561      | 3.050                                | 1.711                                         | 0.664                            | 0.867                                                      | acrylic                  |
| 11.90         | 62.68      | 5.27    | 0.134                                 | 2.40         | 5.57            | 8.14 | 1.034    | 0.799      | 1.583                                | 1.265                                         | 0.266                            | 0.316                                                      | acrylic                  |
| 11.90         | 62.68      | 5.27    | 0.280                                 | 4.44         | 6.32            | 8.66 | 1.031    | 0.653      | 2.037                                | 1.331                                         | 0.412                            | 0.516                                                      | acrylic                  |
| 11.90         | 62.68      | 5.27    | 0.592                                 | 7.63         | 7.75            | 9.06 | 1.028    | 0.556      | 3.067                                | 1.704                                         | 0.603                            | 0.839                                                      | acrylic                  |
| 11.66         | 62.90      | 5.39    | 0.124                                 | 2.30         | 5.38            | 8.39 | 1.033    | 0.810      | 1.477                                | 1.196                                         | 0.239                            | 0.277                                                      | acrylic                  |
| 11.66         | 62.90      | 5.39    | 0.214                                 | 3.59         | 5.98            | 8.95 | 1.029    | 0.706      | 1.821                                | 1.286                                         | 0.339                            | 0.420                                                      | acrylic                  |
| 11.66         | 62.90      | 5.39    | 0.394                                 | 5.77         | 6.83            | 8.79 | 1.030    | 0.597      | 2.379                                | 1.420                                         | 0.444                            | 0.605                                                      | acrylic                  |
| 11.66         | 62.90      | 5.39    | 0.599                                 | 7.82         | 7.67            | 8.61 | 1.031    | 0.531      | 2.996                                | 1.592                                         | 0.559                            | 0.782                                                      | acrylic                  |
| 11.66         | 62.90      | 5.39    | 0.746                                 | 8.74         | 8.54            | 9.13 | 1.028    | 0.530      | 3.716                                | 1.971                                         | 0.718                            | 0.994                                                      | acrylic                  |
| 3.65          | 19.93      | 5.46    | 0.054                                 | 1.32         | 4.11            | 7.37 | 1.041    | 0.616      | 0.860                                | 0.530                                         | 0.149                            | 0.190                                                      | acrylic                  |
| 3.65          | 19.93      | 5.46    | 0.084                                 | 1.77         | 4.78            | 7.71 | 1.038    | 0.562      | 1.166                                | 0.655                                         | 0.204                            | 0.271                                                      | acrylic                  |
| 3.65          | 19.93      | 5.46    | 0.175                                 | 3.01         | 5.80            | 8.42 | 1.032    | 0.487      | 1.715                                | 0.835                                         | 0.299                            | -                                                          | acrylic                  |
| 3.65          | 19.93      | 5.46    | 0.314                                 | 4.86         | 6.46            | 8.84 | 1.030    | 0.428      | 2.129                                | 0.911                                         | 0.348                            | -                                                          | acrylic                  |
| 3.65          | 19.93      | 5.46    | 0.582                                 | 6.62         | 8.78            | 9.28 | 1.027    | 0.402      | 3.935                                | 1.583                                         | 0.630                            | -                                                          | acrylic                  |
| 3.65          | 19.93      | 5.46    | 0.600                                 | 7.84         | 7.66            | 9.35 | 1.027    | 0.384      | 2.991                                | 1.149                                         | 0.460                            | -                                                          | acrylic                  |
| 6.38          | 37.59      | 5.90    | 0.106                                 | 2.03         | 5.23            | 7.85 | 1.037    | 0.666      | 1.396                                | 0.930                                         | 0.211                            | 0.266                                                      | acrylic                  |
| 6.38          | 37.59      | 5.90    | 0.370                                 | 4.84         | 7.65            | 8.44 | 1.032    | 0.502      | 2.980                                | 1.497                                         | 0.486                            | -                                                          | acrylic                  |
| 6.38          | 37.59      | 5.90    | 0.390                                 | 5.73         | 6.80            | 8.66 | 1.031    | 0.482      | 2.356                                | 1.135                                         | 0.378                            | -                                                          | acrylic                  |
| 6.38          | 37.59      | 5.90    | 0.576                                 | 6.46         | 8.91            | 8.64 | 1.031    | 0.461      | 4.052                                | 1.869                                         | 0.644                            | 0.959                                                      | acrylic                  |
| 6.38          | 37.59      | 5.90    | 0.580                                 | 7.63         | 7.60            | 8.58 | 1.031    | 0.433      | 2.949                                | 1.276                                         | 0.456                            | 0.690                                                      | acrylic                  |
| 6.23          | 37.69      | 6.05    | 0.119                                 | 2.24         | 5.32            | 8.63 | 1.031    | 0.661      | 1.446                                | 0.955                                         | 0.223                            | 0.288                                                      | acrylic                  |
| 6.23          | 37.69      | 6.05    | 0.235                                 | 3.69         | 6.37            | 9.07 | 1.028    | 0.571      | 2.071                                | 1.182                                         | 0.340                            | 0.459                                                      | acrylic                  |
| 6.23          | 37.69      | 6.05    | 0.237                                 | 3.89         | 6.08            | 9.03 | 1.029    | 0.560      | 1.886                                | 1.055                                         | 0.312                            | 0.436                                                      | acrylic                  |
| 6.23          | 37.69      | 6.05    | 0.566                                 | 5.91         | 9.58            | 8.72 | 1.030    | 0.475      | 4.680                                | 2.225                                         | 0.702                            | -                                                          | acrylic                  |

| Offset | Gap   |         | Discharge | Depth | Velocity |      |          |            | Channel  | Boundary       | Attached   | Total                       | Approach     |
|--------|-------|---------|-----------|-------|----------|------|----------|------------|----------|----------------|------------|-----------------------------|--------------|
| $h$    | $s$   | $\beta$ | per unit  | $y$   | $V$      | $N$  | $\alpha$ | $\alpha^*$ | velocity | layer velocity | uplift     | detached                    | flow surface |
| mm     | mm    | -       | width     | cm    | m/s      | -    | -        | -          | head     | head           | $\Delta H$ | $\Delta H + \Delta H_{det}$ | -            |
|        |       |         | $q$       |       |          |      |          |            | $h_v$    | $h_v^*$        | m          | m                           |              |
| 6.23   | 37.69 | 6.05    | 0.570     | 7.59  | 7.51     | 9.14 | 1.028    | 0.453      | 2.874    | 1.301          | 0.442      | -                           | acrylic      |
| 3.00   | 20.32 | 6.78    | 0.037     | 1.06  | 3.49     | 6.83 | 1.047    | 0.600      | 0.620    | 0.372          | 0.094      | 0.108                       | acrylic      |
| 3.00   | 20.32 | 6.78    | 0.048     | 1.24  | 3.86     | 7.32 | 1.041    | 0.582      | 0.760    | 0.442          | 0.116      | 0.143                       | acrylic      |
| 3.00   | 20.32 | 6.78    | 0.125     | 2.23  | 5.60     | 7.88 | 1.036    | 0.483      | 1.597    | 0.771          | 0.232      | 0.302                       | acrylic      |
| 3.00   | 20.32 | 6.78    | 0.319     | 4.94  | 6.46     | 8.98 | 1.029    | 0.403      | 2.129    | 0.859          | 0.306      | -                           | acrylic      |
| 3.00   | 20.32 | 6.78    | 0.595     | 7.66  | 7.77     | 8.77 | 1.030    | 0.340      | 3.078    | 1.047          | 0.409      | -                           | acrylic      |
| 11.06  | 75.57 | 6.83    | 0.148     | 2.61  | 5.66     | 8.08 | 1.035    | 0.752      | 1.632    | 1.228          | 0.229      | 0.270                       | acrylic      |
| 11.06  | 75.57 | 6.83    | 0.312     | 4.85  | 6.43     | 8.81 | 1.030    | 0.623      | 2.105    | 1.311          | 0.351      | 0.454                       | acrylic      |
| 11.06  | 75.57 | 6.83    | 0.589     | 7.59  | 7.76     | 9.36 | 1.027    | 0.554      | 3.072    | 1.701          | 0.515      | 0.709                       | acrylic      |
| 11.06  | 75.57 | 6.83    | 0.755     | 8.82  | 8.57     | 9.21 | 1.028    | 0.523      | 3.742    | 1.956          | 0.617      | 0.872                       | acrylic      |
| 3.71   | 27.12 | 7.30    | 0.040     | 1.11  | 3.60     | 6.99 | 1.045    | 0.654      | 0.662    | 0.433          | 0.083      | 0.098                       | acrylic      |
| 3.71   | 27.12 | 7.30    | 0.050     | 1.27  | 3.96     | 7.27 | 1.042    | 0.627      | 0.798    | 0.501          | 0.103      | 0.127                       | acrylic      |
| 3.71   | 27.12 | 7.30    | 0.066     | 1.52  | 4.31     | 7.11 | 1.044    | 0.575      | 0.947    | 0.545          | 0.132      | 0.169                       | acrylic      |
| 3.71   | 27.12 | 7.30    | 0.091     | 1.84  | 4.93     | 7.45 | 1.040    | 0.546      | 1.241    | 0.678          | 0.166      | 0.223                       | acrylic      |
| 3.71   | 27.12 | 7.30    | 0.112     | 2.07  | 5.39     | 7.98 | 1.036    | 0.543      | 1.482    | 0.804          | 0.195      | 0.267                       | acrylic      |
| 3.71   | 27.12 | 7.30    | 0.151     | 2.67  | 5.65     | 8.55 | 1.032    | 0.516      | 1.629    | 0.841          | 0.229      | 0.306                       | acrylic      |
| 3.71   | 27.12 | 7.30    | 0.207     | 3.48  | 5.94     | 8.67 | 1.031    | 0.475      | 1.800    | 0.855          | 0.254      | 0.372                       | acrylic      |
| 3.71   | 27.12 | 7.30    | 0.211     | 3.52  | 5.99     | 8.34 | 1.033    | 0.460      | 1.827    | 0.840          | 0.244      | 0.384                       | acrylic      |
| 3.71   | 27.12 | 7.30    | 0.256     | 4.13  | 6.19     | 8.62 | 1.031    | 0.446      | 1.952    | 0.870          | 0.276      | -                           | acrylic      |
| 3.71   | 27.12 | 7.30    | 0.313     | 4.83  | 6.47     | 8.63 | 1.031    | 0.423      | 2.135    | 0.902          | 0.293      | -                           | acrylic      |
| 3.71   | 27.12 | 7.30    | 0.358     | 5.34  | 6.70     | 8.72 | 1.030    | 0.412      | 2.289    | 0.942          | 0.309      | -                           | acrylic      |
| 3.71   | 27.12 | 7.30    | 0.387     | 5.71  | 6.78     | 8.74 | 1.030    | 0.403      | 2.345    | 0.946          | 0.316      | -                           | acrylic      |
| 3.71   | 27.12 | 7.30    | 0.478     | 6.66  | 7.17     | 9.05 | 1.029    | 0.395      | 2.623    | 1.036          | 0.347      | -                           | acrylic      |
| 3.71   | 27.12 | 7.30    | 0.591     | 7.67  | 7.70     | 8.76 | 1.030    | 0.365      | 3.026    | 1.105          | 0.384      | -                           | acrylic      |
| 3.71   | 27.12 | 7.30    | 0.742     | 8.69  | 8.54     | 8.90 | 1.029    | 0.356      | 3.719    | 1.323          | 0.458      | -                           | acrylic      |
| 6.57   | 50.74 | 7.73    | 0.089     | 1.77  | 5.03     | 6.94 | 1.046    | 0.682      | 1.290    | 0.879          | 0.154      | 0.183                       | acrylic      |
| 6.57   | 50.74 | 7.73    | 0.098     | 1.88  | 5.21     | 7.84 | 1.037    | 0.693      | 1.387    | 0.961          | 0.166      | 0.198                       | acrylic      |
| 6.57   | 50.74 | 7.73    | 0.164     | 2.86  | 5.73     | 8.21 | 1.034    | 0.604      | 1.677    | 1.013          | 0.234      | 0.295                       | acrylic      |
| 6.57   | 50.74 | 7.73    | 0.333     | 5.11  | 6.51     | 8.58 | 1.031    | 0.503      | 2.160    | 1.087          | 0.320      | 0.453                       | acrylic      |
| 6.57   | 50.74 | 7.73    | 0.589     | 7.60  | 7.75     | 8.80 | 1.030    | 0.447      | 3.064    | 1.370          | 0.440      | -                           | acrylic      |
| 3.37   | 27.58 | 8.17    | 0.036     | 1.03  | 3.45     | 7.76 | 1.037    | 0.673      | 0.608    | 0.409          | 0.069      | 0.084                       | acrylic      |
| 3.37   | 27.58 | 8.17    | 0.071     | 1.56  | 4.58     | 7.65 | 1.038    | 0.570      | 1.068    | 0.609          | 0.127      | 0.166                       | acrylic      |
| 3.37   | 27.58 | 8.17    | 0.142     | 2.57  | 5.53     | 7.99 | 1.036    | 0.483      | 1.558    | 0.753          | 0.197      | 0.278                       | acrylic      |
| 3.37   | 27.58 | 8.17    | 0.303     | 4.72  | 6.41     | 8.58 | 1.031    | 0.410      | 2.097    | 0.860          | 0.263      | -                           | acrylic      |
| 3.37   | 27.58 | 8.17    | 0.588     | 7.60  | 7.74     | 9.09 | 1.028    | 0.368      | 3.054    | 1.123          | 0.363      | -                           | acrylic      |

| Offset<br>$h$ | Gap<br>$s$ | $\beta$ | Discharge<br>per unit<br>width<br>$q$ | Depth<br>$y$ | Velocity<br>$V$ | $N$  | $\alpha$ | $\alpha^*$ | Channel<br>velocity<br>head<br>$h_v$ | Boundary<br>layer velocity<br>head<br>$h_v^*$ | Attached<br>uplift<br>$\Delta H$ | Total<br>detached<br>uplift<br>$\Delta H + \Delta H_{det}$ | Approach<br>flow surface |
|---------------|------------|---------|---------------------------------------|--------------|-----------------|------|----------|------------|--------------------------------------|-----------------------------------------------|----------------------------------|------------------------------------------------------------|--------------------------|
| mm            | mm         | -       | m <sup>2</sup> /s                     | cm           | m/s             | -    | -        | -          | m                                    | m                                             | m                                | m                                                          | -                        |
| 3.37          | 27.58      | 8.17    | 0.732                                 | 8.63         | 8.47            | 9.10 | 1.028    | 0.353      | 3.661                                | 1.293                                         | 0.445                            | -                                                          | acrylic                  |
| 8.40          | 75.83      | 9.03    | 0.119                                 | 2.18         | 5.44            | 8.00 | 1.035    | 0.724      | 1.510                                | 1.094                                         | 0.155                            | 0.178                                                      | acrylic                  |
| 8.40          | 75.83      | 9.03    | 0.236                                 | 3.93         | 6.02            | 8.88 | 1.030    | 0.611      | 1.847                                | 1.129                                         | 0.224                            | 0.288                                                      | acrylic                  |
| 8.40          | 75.83      | 9.03    | 0.373                                 | 5.54         | 6.72            | 8.71 | 1.031    | 0.538      | 2.303                                | 1.239                                         | 0.281                            | 0.403                                                      | acrylic                  |
| 8.40          | 75.83      | 9.03    | 0.590                                 | 7.62         | 7.74            | 9.17 | 1.028    | 0.500      | 3.055                                | 1.526                                         | 0.391                            | -                                                          | acrylic                  |
| 3.84          | 37.34      | 9.71    | 0.045                                 | 1.18         | 3.78            | 6.81 | 1.047    | 0.639      | 0.727                                | 0.464                                         | 0.068                            | 0.083                                                      | acrylic                  |
| 3.84          | 37.34      | 9.71    | 0.165                                 | 2.89         | 5.72            | 8.26 | 1.034    | 0.497      | 1.669                                | 0.829                                         | 0.191                            | -                                                          | acrylic                  |
| 3.84          | 37.34      | 9.71    | 0.588                                 | 7.63         | 7.71            | 9.06 | 1.028    | 0.382      | 3.033                                | 1.160                                         | 0.328                            | -                                                          | acrylic                  |
| 3.45          | 43.98      | 12.75   | 0.056                                 | 1.35         | 4.15            | 7.59 | 1.039    | 0.606      | 0.877                                | 0.532                                         | 0.064                            | -                                                          | acrylic                  |
| 3.45          | 43.98      | 12.75   | 0.115                                 | 2.19         | 5.27            | 7.88 | 1.036    | 0.513      | 1.415                                | 0.725                                         | 0.118                            | -                                                          | acrylic                  |
| 3.45          | 43.98      | 12.75   | 0.230                                 | 3.77         | 6.10            | 8.77 | 1.030    | 0.454      | 1.898                                | 0.862                                         | 0.175                            | -                                                          | acrylic                  |
| 3.45          | 43.98      | 12.75   | 0.465                                 | 6.47         | 7.19            | 8.91 | 1.029    | 0.384      | 2.636                                | 1.012                                         | 0.230                            | -                                                          | acrylic                  |
| 3.45          | 43.98      | 12.75   | 0.598                                 | 7.62         | 7.85            | 8.74 | 1.030    | 0.356      | 3.142                                | 1.119                                         | 0.268                            | -                                                          | acrylic                  |
| 3.26          | 55.89      | 17.15   | 0.150                                 | 2.64         | 5.70            | 8.35 | 1.033    | 0.487      | 1.654                                | 0.806                                         | 0.109                            | -                                                          | acrylic                  |
| 3.26          | 55.89      | 17.15   | 0.251                                 | 4.07         | 6.16            | 8.58 | 1.031    | 0.427      | 1.937                                | 0.827                                         | 0.131                            | -                                                          | acrylic                  |
| 3.26          | 55.89      | 17.15   | 0.566                                 | 5.89         | 9.60            | 8.81 | 1.030    | 0.384      | 4.697                                | 1.804                                         | 0.321                            | -                                                          | acrylic                  |
| 3.26          | 55.89      | 17.15   | 0.571                                 | 7.60         | 7.52            | 9.07 | 1.028    | 0.363      | 2.882                                | 1.046                                         | 0.208                            | -                                                          | acrylic                  |
| 3.06          | 56.30      | 18.38   | 0.056                                 | 1.36         | 4.12            | 7.86 | 1.037    | 0.588      | 0.865                                | 0.508                                         | 0.049                            | -                                                          | acrylic                  |
| 3.06          | 56.30      | 18.38   | 0.115                                 | 2.17         | 5.28            | 8.20 | 1.034    | 0.505      | 1.424                                | 0.719                                         | 0.086                            | -                                                          | acrylic                  |
| 3.06          | 56.30      | 18.38   | 0.224                                 | 3.71         | 6.05            | 8.37 | 1.033    | 0.423      | 1.866                                | 0.789                                         | 0.127                            | -                                                          | acrylic                  |
| 3.06          | 56.30      | 18.38   | 0.372                                 | 5.47         | 6.80            | 8.77 | 1.030    | 0.384      | 2.360                                | 0.907                                         | 0.161                            | -                                                          | acrylic                  |
| 3.06          | 56.30      | 18.38   | 0.598                                 | 7.46         | 8.02            | 7.89 | 1.036    | 0.308      | 3.282                                | 1.011                                         | 0.212                            | -                                                          | acrylic                  |
| 1.37          | 44.08      | 32.08   | 0.037                                 | 1.06         | 3.51            | 7.58 | 1.039    | 0.463      | 0.627                                | 0.290                                         | 0.028                            | -                                                          | acrylic                  |
| 1.37          | 44.08      | 32.08   | 0.070                                 | 1.55         | 4.51            | 7.80 | 1.037    | 0.408      | 1.035                                | 0.422                                         | 0.050                            | -                                                          | acrylic                  |
| 1.37          | 44.08      | 32.08   | 0.140                                 | 2.53         | 5.54            | 7.93 | 1.036    | 0.344      | 1.565                                | 0.539                                         | 0.084                            | -                                                          | acrylic                  |
| 1.37          | 44.08      | 32.08   | 0.279                                 | 4.34         | 6.42            | 8.62 | 1.031    | 0.310      | 2.104                                | 0.653                                         | 0.123                            | -                                                          | acrylic                  |
| 1.37          | 44.08      | 32.08   | 0.598                                 | 7.62         | 7.85            | 8.88 | 1.030    | 0.265      | 3.145                                | 0.834                                         | 0.188                            | -                                                          | acrylic                  |
| 10.40         | 0.76       | 0.073   | 0.138                                 | 2.56         | 5.38            | 8.22 | 1.034    | 0.744      | 1.473                                | 1.096                                         | -                                | 0.854                                                      | acrylic                  |
| 10.18         | 4.63       | 0.45    | 0.125                                 | 2.34         | 5.35            | 7.43 | 1.040    | 0.743      | 1.461                                | 1.086                                         | -                                | 0.746                                                      | acrylic                  |
| 9.56          | 4.55       | 0.48    | 0.016                                 | 0.67         | 2.45            | 7.52 | 1.040    | 1.199      | 0.305                                | 0.366                                         | -                                | 0.169                                                      | acrylic                  |
| 9.56          | 4.55       | 0.48    | 0.026                                 | 0.84         | 3.05            | 7.17 | 1.043    | 1.102      | 0.474                                | 0.522                                         | -                                | 0.248                                                      | acrylic                  |
| 9.56          | 4.55       | 0.48    | 0.041                                 | 1.10         | 3.68            | 6.64 | 1.049    | 0.985      | 0.691                                | 0.681                                         | -                                | 0.365                                                      | acrylic                  |
| 9.56          | 4.55       | 0.48    | 0.083                                 | 1.71         | 4.83            | 7.45 | 1.040    | 0.823      | 1.190                                | 0.979                                         | -                                | 0.593                                                      | acrylic                  |
| 9.87          | 9.59       | 0.97    | 0.091                                 | 1.82         | 4.98            | 7.86 | 1.037    | 0.820      | 1.263                                | 1.037                                         | -                                | 0.610                                                      | acrylic                  |
| 8.40          | 75.83      | 9.03    | 0.091                                 | 1.82         | 4.98            | 7.75 | 1.038    | 0.769      | 1.266                                | 0.974                                         | -                                | 0.145                                                      | acrylic                  |

| Offset<br>$h$ | Gap<br>$s$ | $\beta$ | Discharge<br>per unit<br>width<br>$q$ | Depth<br>$y$ | Velocity<br>$V$ | $N$  | $\alpha$ | $\alpha^*$ | Channel<br>velocity<br>head<br>$h_v$ | Boundary<br>layer velocity<br>head<br>$h_v^*$ | Attached<br>uplift<br>$\Delta H$ | Total<br>detached<br>uplift<br>$\Delta H + \Delta H_{det}$ | Approach<br>flow surface |
|---------------|------------|---------|---------------------------------------|--------------|-----------------|------|----------|------------|--------------------------------------|-----------------------------------------------|----------------------------------|------------------------------------------------------------|--------------------------|
| mm            | mm         | -       | m <sup>2</sup> /s                     | cm           | m/s             | -    | -        | -          | m                                    | m                                             | m                                | m                                                          | -                        |
| 20.73         | 7.23       | 0.35    | 0.393                                 | 6.26         | 6.29            | 5.00 | 1.080    | 0.557      | 2.015                                | 1.122                                         | 0.920                            | 0.969                                                      | ROUGH                    |
| 20.73         | 7.23       | 0.35    | 0.746                                 | 9.34         | 7.99            | 5.01 | 1.080    | 0.438      | 3.259                                | 1.428                                         | 1.326                            | 1.428                                                      | ROUGH                    |
| 2.98          | 6.37       | 2.14    | 0.598                                 | 8.08         | 7.40            | 5.78 | 1.063    | 0.191      | 2.791                                | 0.534                                         | 0.408                            | -                                                          | ROUGH                    |
| 2.36          | 10.91      | 4.61    | 0.237                                 | 4.17         | 5.68            | 4.98 | 1.080    | 0.192      | 1.644                                | 0.316                                         | 0.168                            | -                                                          | ROUGH                    |
| 2.36          | 10.91      | 4.61    | 0.390                                 | 5.99         | 6.51            | 5.09 | 1.078    | 0.160      | 2.160                                | 0.346                                         | 0.186                            | -                                                          | ROUGH                    |
| 4.73          | 37.82      | 8.00    | 0.137                                 | 3.53         | 3.90            | 5.61 | 1.066    | 0.364      | 0.774                                | 0.281                                         | 0.081                            | -                                                          | ROUGH                    |

## References

- Auel, C., I. Albayrak, and R. M. Boes. 2014. "Turbulence characteristics in supercritical open channel flows: effects of Froude number and aspect ratio." *J. Hydraul. Engrg.* 140(4). [https://doi.org/10.1061/\(ASCE\)HY.1943-7900.0000841](https://doi.org/10.1061/(ASCE)HY.1943-7900.0000841)
- Falvey, H. T. 1990. *Cavitation in Chutes and Spillways*. Bureau of Reclamation, Engrg. Monograph 42.
- Pan, S., Y. Shao, Q. Shi, and X. Dong. 1980. "Self-aeration capacity of a water jet over an aeration ramp," *Shuili Xuebao*, No. 5, pp. 13.22, Beijing, China. (Bureau of Reclamation Translation No. 1868, book No.12455, paper No. 2)
- Pfister, M. and W. H. Hager. 2010. "Chute aerators. I: air transport characteristics." *J. Hyd. Engrg.* 136(6):352-359. [https://doi.org/10.1061/\(ASCE\)HY.1943-7900.0000189](https://doi.org/10.1061/(ASCE)HY.1943-7900.0000189)
